# Supplementary material for: Expansion of breast cancer stem cells with fibrous scaffolds
Source: Royal Society of Chemistry journal article supplement (doi:10.1039/c3ib20255k), 2013-01-01
Supplement: c3ib20255k.pdf [file c3ib20255k.pdf]

# Expansion of Breast Cancer Stem Cells with Fibrous Scaffolds

Sheng Feng,<sup>a</sup> Xinrui Duan,<sup>a</sup> Pang-Kuo Lo,<sup>b</sup> Shou Liu,<sup>b</sup> Xinfeng Liu,<sup>c</sup> Hexin Chen<sup>\*b</sup> and Qian Wang<sup>\*a</sup>

<sup>a</sup> Department of Chemistry and Biochemistry, University of South Carolina, Columbia, SC 29208, USA. E-mail: wang263@mailbox.sc.edu

<sup>b</sup> Department of Biology, University of South Carolina, Columbia, SC 29208, USA. E-mail: chen53@mailbox.sc.edu

<sup>c</sup> Department of Mathematics, University of South Carolina, Columbia, SC 29208, USA.

## Supplement Material

### Materials and Methods

Immunofluorescence staining and western blot were performed as described previously.<sup>1</sup> Antibodies used were rabbit anti-vimentin (D21H3, Cell Signaling Technology; dilution 1:100), rabbit anti-*E*-cadherin (24E10, Cell Signaling Technology; dilution 1:100), and Alexa Fluor 488-conjugated goat anti-rabbit IgG (Molecular Probe; dilution 1:200).

### Supplementary Table and Figure

Table S1. List of primers

| Gene Name | Forward sequence 5'-3'           | Reverse sequence 3'-5'       |
|-----------|----------------------------------|------------------------------|
| SOX2      | GCTTTTGTTCGATCCCACTTTC           | ATGGATTCTCGGCAGACTGATTC      |
| OCT3/4    | CGAAAGAGAAAGCGAACCAGTATC         | AGAACCACACTCGGACCACATC       |
| SOX4      | GCATGATGATAGCATATGTGTTCAAGT      | CGGCATATTGCACAGGATGGA        |
| ITGA6     | CAAATGCAGGCACTCAGGTTC            | GCATCAAGATCCCAGCGAGA         |
| ITGA5     | GTCAGCAGCTCCTATATGTGACCAGA       | CCCTCGGGATCCAACTCCAG         |
| SNAIL     | GCCTAGCGAGTGGTTCTTCTG            | CTGCTGGAAGGTAACTCTGGATT      |
| SLUG      | GCGAACTGGACACACATACAGTGAT        | GTGGAATGGAGCAGCGGTAGT        |
| ZEB1      | GAGACATAAATATGAACACACAGGTAAAAGAC | TTGAGAATAAGACCCAGAGTGTGAGAAG |
| ZEB2      | CCACCAGTCCAGACCAGTATTCCT         | CATCAAGCAATTCTCCCTGAAATC     |
| TWIST1    | GCCGGAGACCTAGATGTCATTGT          | GCCCTGTTTCTTTGAATTTGGAT      |
| TWIST2    | GCTGCCCTCTGACAAGCTGA             | CTTATTGTCCATCTCGTCGCTCTG     |
| VIM       | GAAGGCGAGGAGAGCAGGATT            | AGAAGTTTCGTTGATAACCTGTCCA    |
| FOXC2     | CAGCAGCAAACCTTCCCCAAC            | CAGTATTTCTGTGAGTCGTAGGAGTAG  |
| CDH-1     | AGGCCAAGCAGCAGTACATT             | ATTCACATCCAGCACATCCA         |
| CD24      | AAACAACAACCTGGAACCTCAAGTAACTC    | GGTGGTGGCATTAGTTGGATT        |
| CD44t     | TCCAACACCTCCCAGTATGACA           | GGCAGGTCTGTGACTGATGTACA      |
| CD44v     | CCACATTCTACAAGCACAA              | CTGTTGCCAAACCACTGTTCC        |
| CD44s     | TCCCTGCTACCAGAGACCAAGACA         | ACCAGAGTTGTGTTTGCTCCACC      |
| GAPDH     | GAGTCAACGGATTTGGTCGTAT           | ATGGGTGGAATCATATTGGAAC       |
| TGF-beta3 | AGCGGAATGAGCAGAGGATCGA           | CTCAACAGCCACTCACGCACAG       |

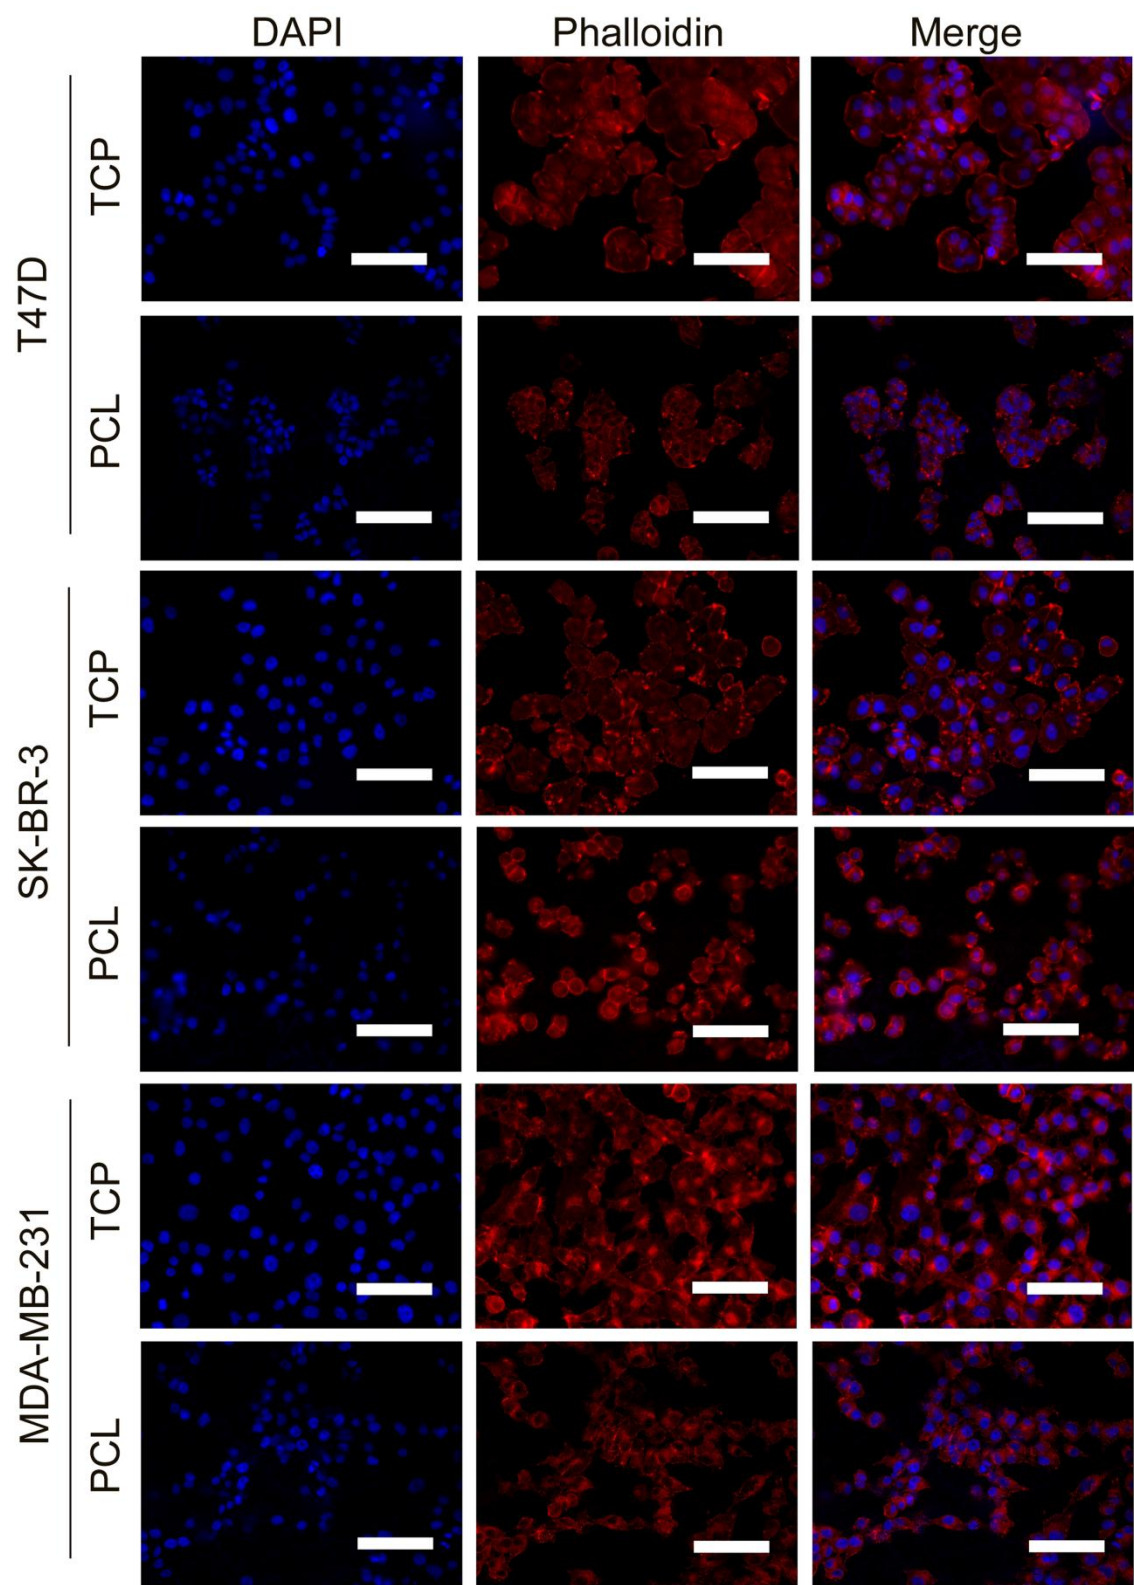

**Fig. S1.** Fluorescence microscopy images of T47D, SK-BR-3, and MDA-MB-231 cells cultured in 2D tissue culture plastics (TCP) and 3D PCL fibrous scaffolds (PCL). Blue indicates nuclei (DAPI); Red indicates F-actin (Rhodamine-Phalloidin). All scale bars indicate 100  $\mu\text{m}$ .

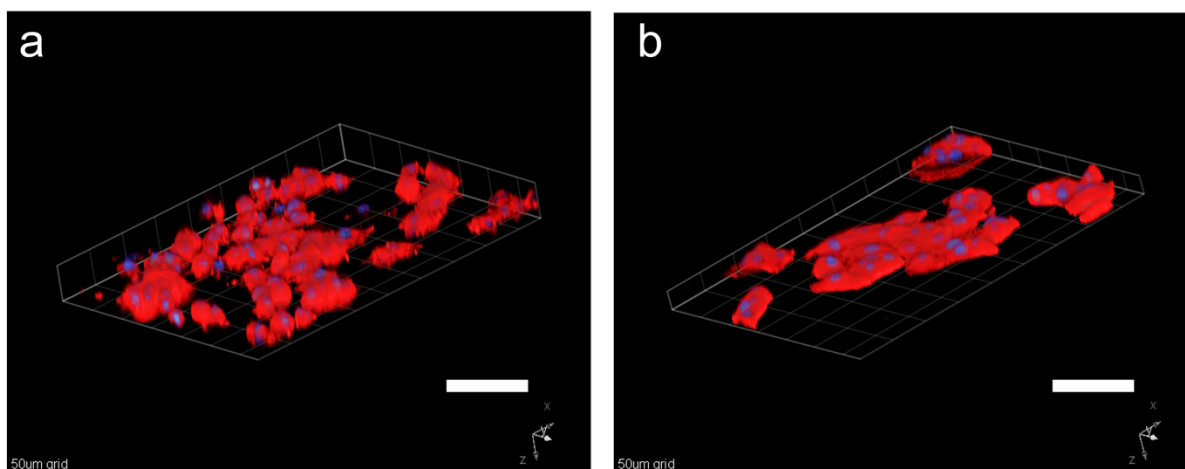

**Fig. S2.** MCF-7 cells seeded in PCL fibrous scaffold occupied architectural features of the matrix in three dimensions as observed using confocal microscope. 3D reconstruction of sequential strata demonstrated MCF-7 occupation of sub-surface niches within the PCL scaffold. Serial z-plane sampling was conducted for total z-scan distance of 45  $\mu\text{m}$  at 3  $\mu\text{m}$  per plane for cells in PCL scaffolds (a) and 20  $\mu\text{m}$  at 3  $\mu\text{m}$  per plane for cells on TCP (b). Blue indicates nuclei (DAPI); Red indicates F-actin (Rhodamine-Phalloidin). All scale bars indicate 100  $\mu\text{m}$ .

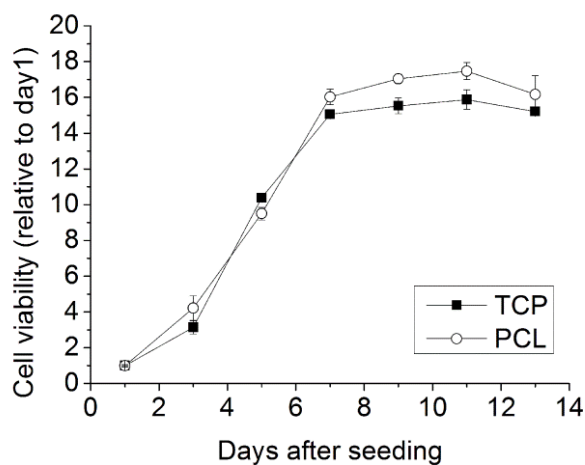

**Fig. S3.** The proliferations of MCF-7 in 2D tissue culture plastics (TCP) and 3D PCL fibrous scaffolds (PCL) were measured at indicated time points by CellTiter-Blue assay. Results were shown as mean  $\pm$  standard deviation. Statistical significance of the differences between cells in TCP and PCL is indicated by two asterisks ( $P < 0.005$ ,  $n = 3$ ).

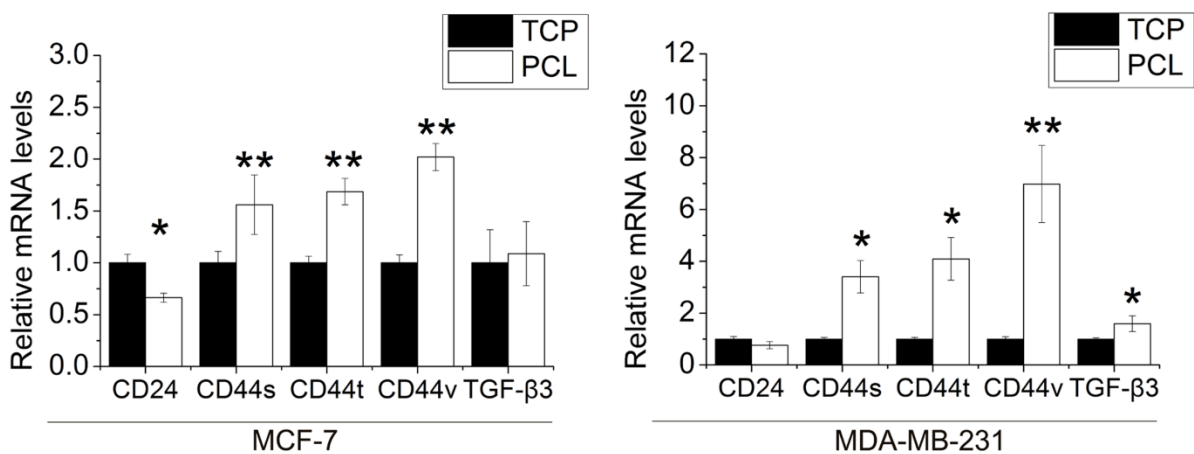

**Fig. S4.** qRT-PCR of CD24, CD44 variants and TGF-β3 expression in MCF-7 and MDA-MB-231 cells cultured in PCL fibrous scaffolds (PCL) compared to cells on TCP. Results were shown as mean± standard deviation. Statistical significance is indicated by single asterisk ( $P < 0.05$ ,  $n = 3$ ) or double asterisks ( $P < 0.005$ ,  $n = 3$ ).

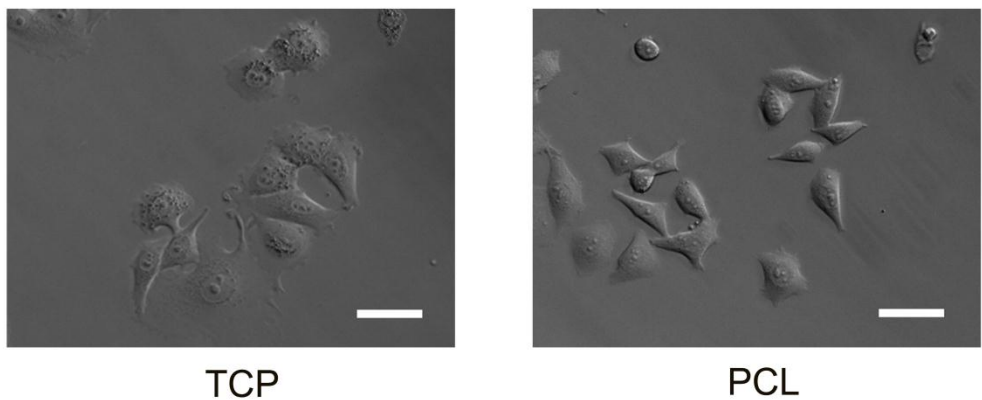

**Fig. S5.** Cells from PCL fibrous scaffolds (PCL) culture displayed a mesenchymal morphology after being re-plated in TCP (right), relative cells from TCP (left). Scale bars indicate 50 μm.

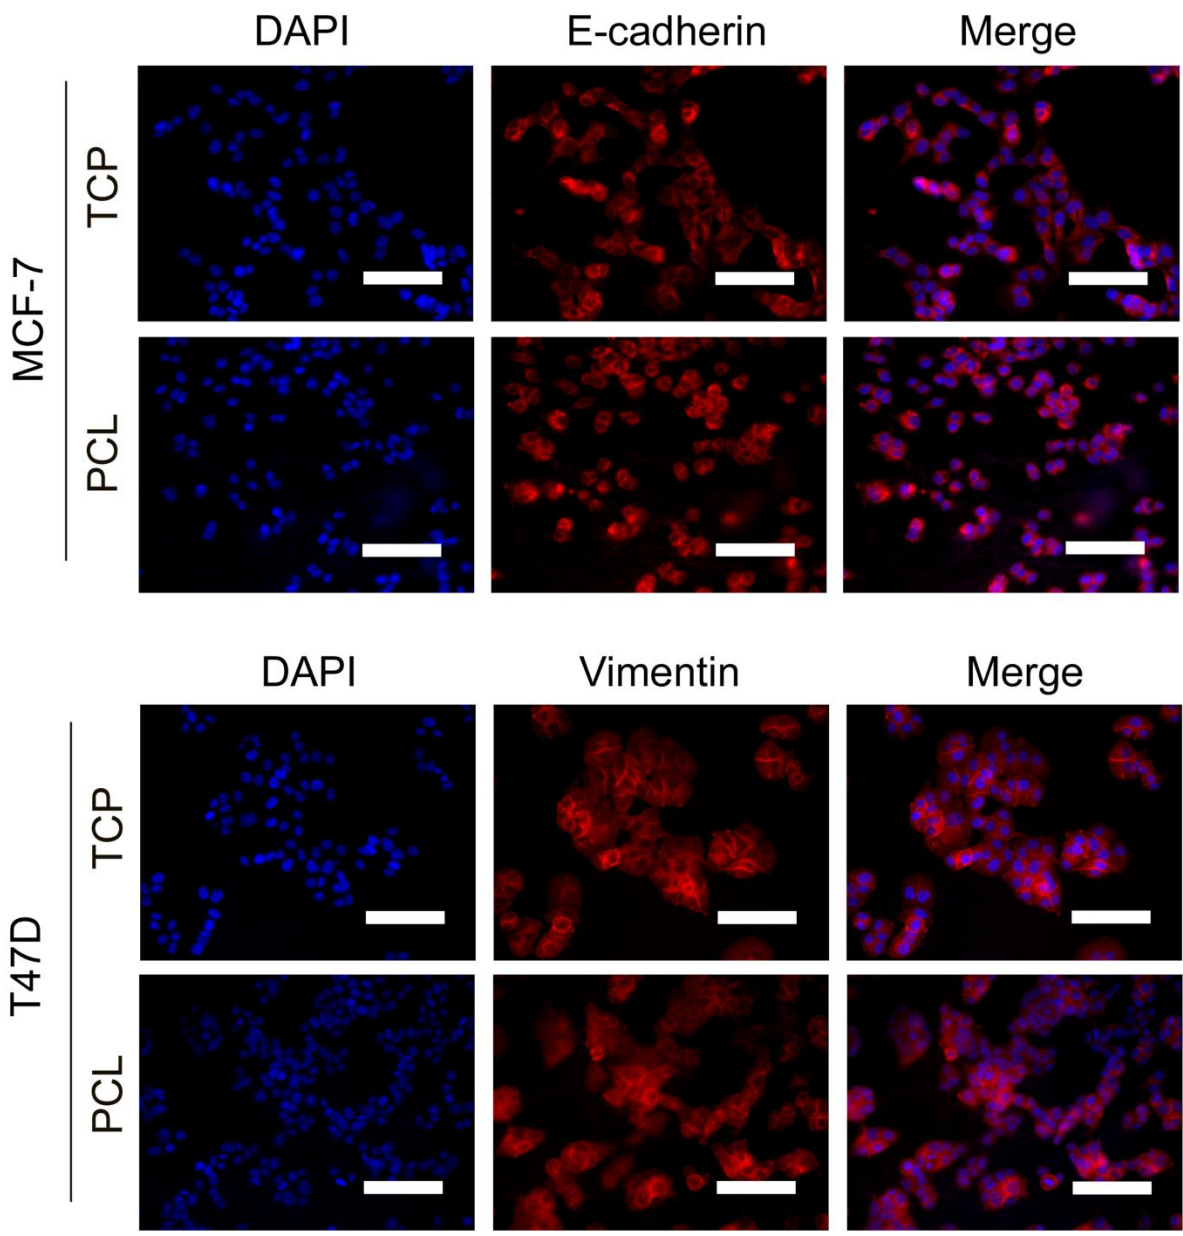

**Fig. S6.** Immunofluorescence staining for *E-cadherin* in MCF-7 and T47D cells cultured in TCP and PCL fibrous scaffolds (PCL). Blue indicates nuclei (DAPI); red indicates *E-cadherin*. All scale bars indicate 100  $\mu\text{m}$ .



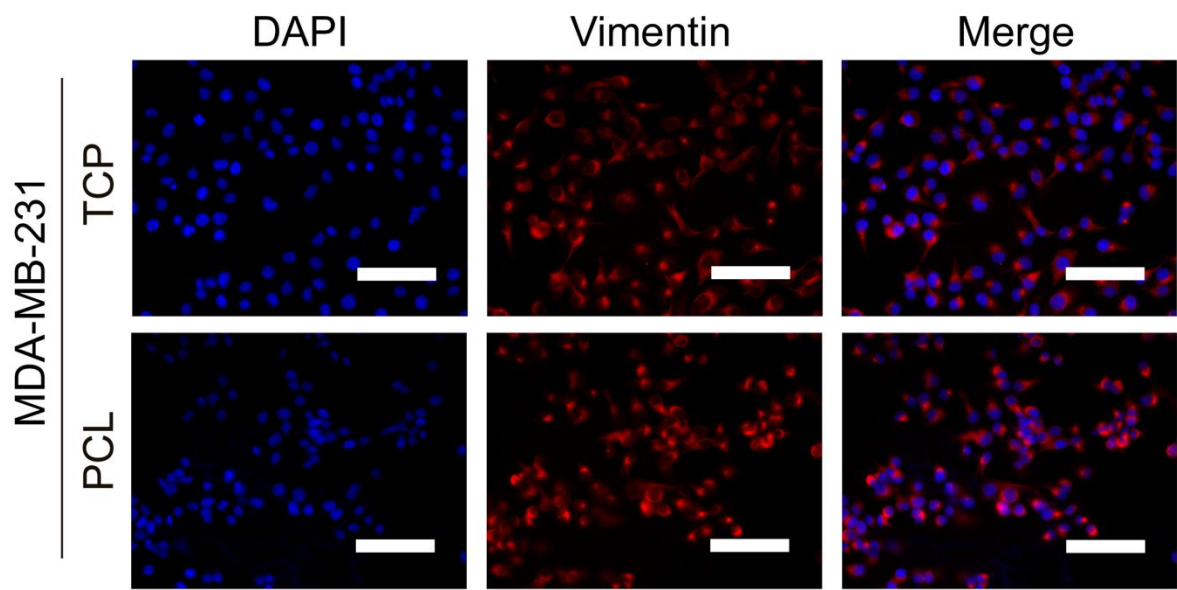

**Fig. S7.** Immunofluorescence staining for vimentin in MDA-MB-231 cells cultured in 2D tissue culture plastics (TCP) and 3D PCL fibrous scaffolds (PCL). Blue indicates nuclei (DAPI); Red indicates vimentin. All scale bars indicate 100  $\mu$ m.

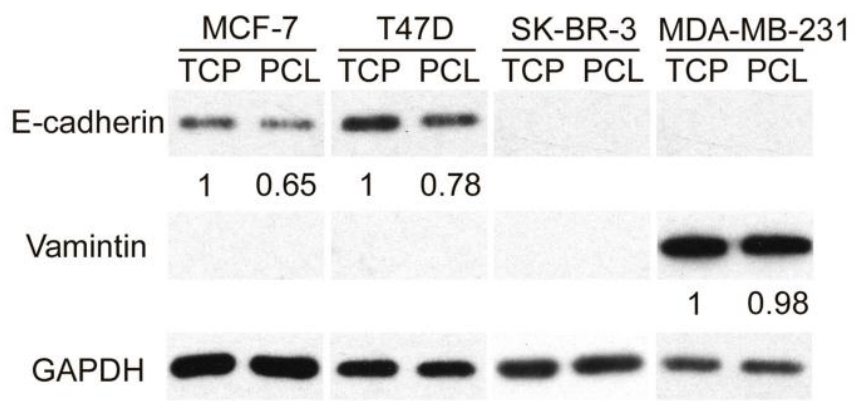

**Fig. S8.** After culturing for 6 days on PCL fibrous scaffolds (PCL) and TCP, cell extracts were used for Western blot analysis to detect the expression of *E*-cadherin and Vimentin. The density of each band was quantified with The Image J software and divided by the density of the corresponding GAPDH band. The ratio is presented under each blot after normalizing the values for TCP control as one unit.

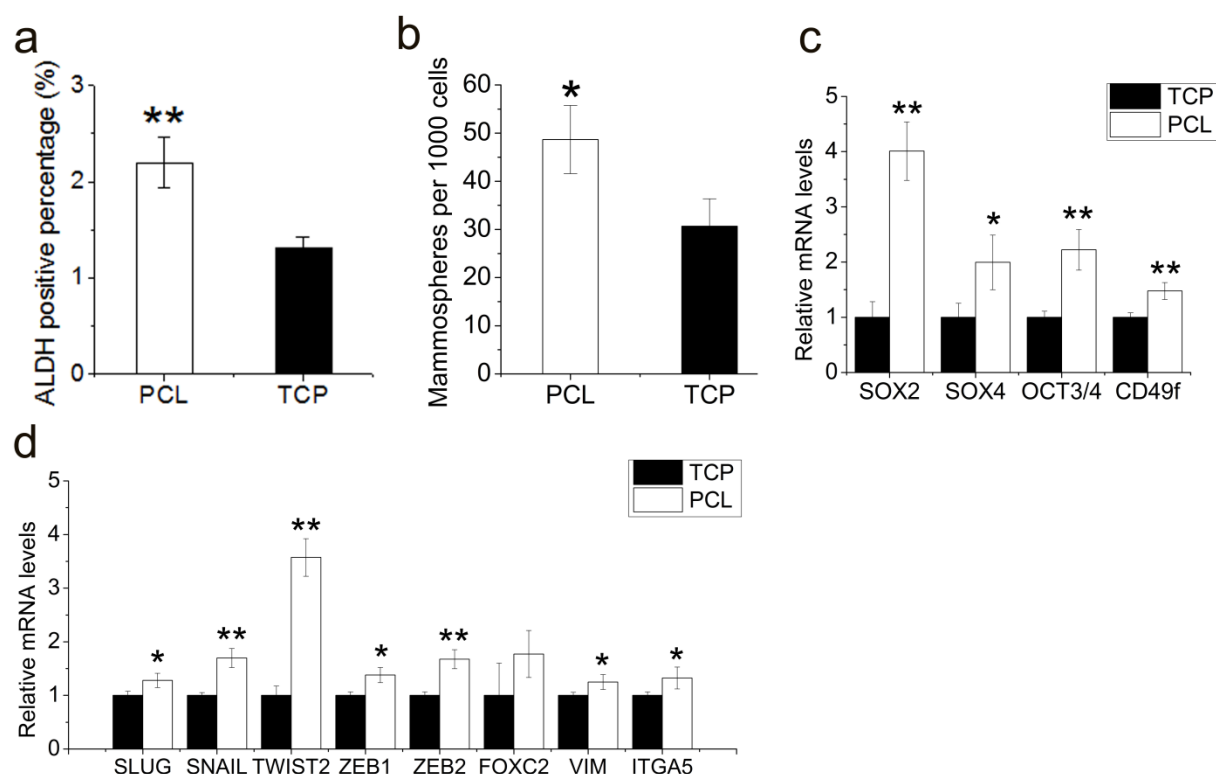

**Fig. S9.** MDA-MB-231 cells cultured in PCL fibrous scaffolds displayed increased CSCs properties and gene expression pattern of EMT. (a) The percentage of ALDH-positive cells in MDA-MB-231 cells cultured in TCP and PCL. Results were shown as mean  $\pm$  standard deviation. Statistical significance is indicated by double asterisks ( $P < 0.001$ ,  $n = 3$ ). (b) MDA-MB-231 cultured in PCL and TCP were trypsinized and then plated in non-adherent conditions in mammosphere medium, as described in Methods. Mammospheres were numerated. Results were shown as mean  $\pm$  standard deviation. Statistical significance is denoted by single asterisks ( $P < 0.05$ ,  $n = 3$ ). (c) qRT-PCR analysis was used to quantify the expression of stem cell markers, SOX2, SOX4, OCT3/4, and CD49f. (d) qRT-PCR analysis was used to quantify the expression of EMT markers in MDA-MB-231 from PCL and TCP. Results were shown as mean  $\pm$  standard deviation. Statistical significance is indicated by single asterisk ( $P < 0.05$ ,  $n = 3$ ) or double asterisks ( $P < 0.005$ ,  $n = 3$ ).

### Supplementary Movie Legend

**Movie S1:** MCF-7 cells were cultured on PCL fibrous scaffolds for 4 days. Cells were stained with DAPI (nucleus) and Rhodamine-Phalloidin (F-actin). The series movie was generated by serially displaying sequential strata taken on a confocal microscope in 3  $\mu\text{m}$  intervals along the z-axis. The movie shows that some of cells migrated into the under layer of fibrous scaffolds. Scale bar indicates 100  $\mu\text{m}$ .

### References for Supplemental Material

1. D. Guo, K. Hu, Y. Lei, Y. Wang, T. Ma, D. He, *J. Biol. Chem.*, 2004, **279**, 53498-53505.
